# Supplementary material
Source: MDPI journal article supplement (https://www.mdpi.com/2071-1050/14/11/6384)
Supplement: s1 [file s1]

Supplementary material

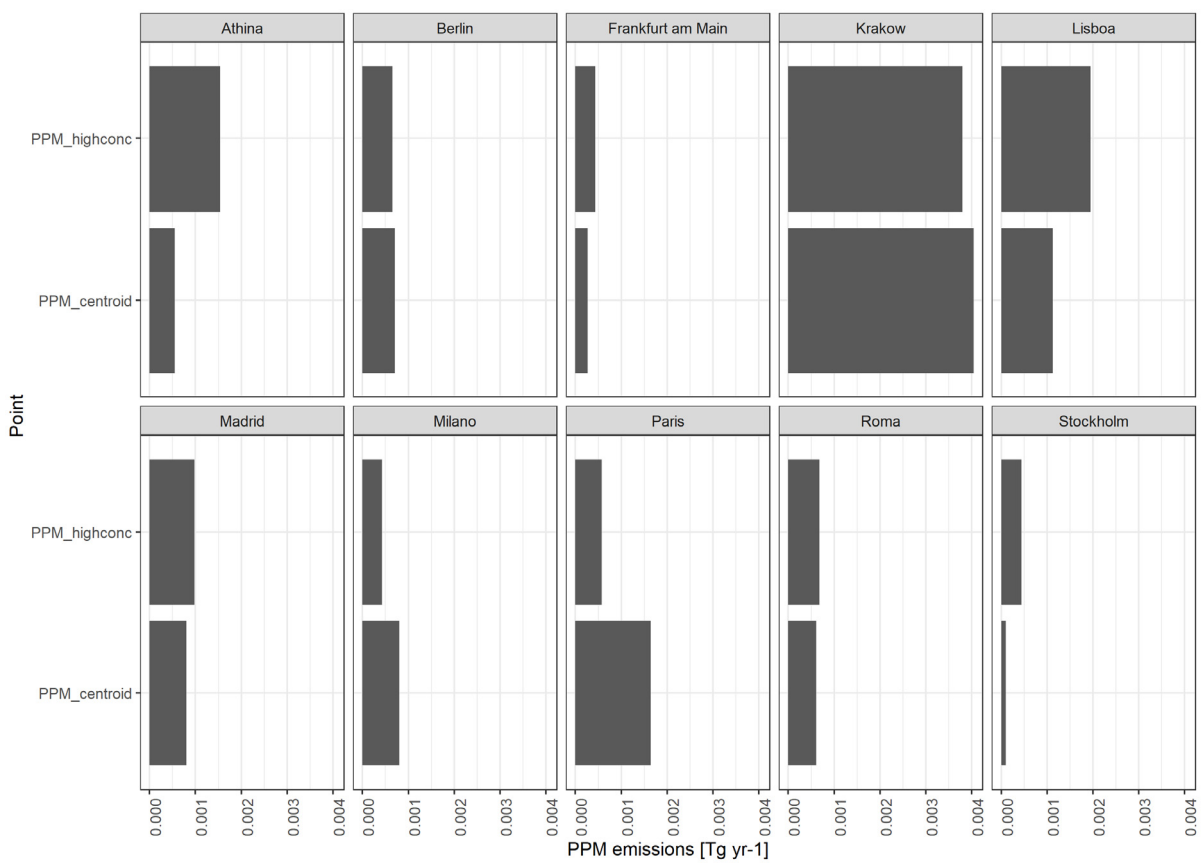

**Figure S1.** it shows the primary PM yearly emissions for the 10 considered cities, comparing the emissions for the centroid and the 'highest concentrations' point. This analysis helps to explain how the local contribution can change, depending on the selected point. See i.e. Figure 3 and Figure 5 of the manuscript, for further details.
